# Supplementary material for: Fast detection of E. coli with a novel fluorescent biosensor based on a FRET system between UCNPs and GO@Fe3O4 in urine specimens
Source: Royal Society of Chemistry journal article supplement (doi:10.1039/d1ay00320h), 2021-01-01
Supplement: d1ay00320h1.pdf [file d1ay00320h1.pdf]

## Supplementary materials

### Fast detection of *E.coli* by a novel fluorescent sensor based on the FRET system between UCNPs and GO@Fe<sub>3</sub>O<sub>4</sub> in urine specimen

#### 1. Calculation of quenching efficiency

The calculation of quenching efficiency was performed as follows: The fluorescence intensity of mPEG-UCNP-Apt at 475 nm was recorded as  $F_1$ . After incubation with GO@Fe<sub>3</sub>O<sub>4</sub>, the fluorescence intensity of supernatant separated by magnetic was recorded as  $F_2$ . And the quenching efficiency was calculated as follows:

$$\text{Quenching efficiency(\%)} = (F_1 - F_2)/F_1.$$

#### 2. The ultraviolet spectrum of GO@Fe<sub>3</sub>O<sub>4</sub>

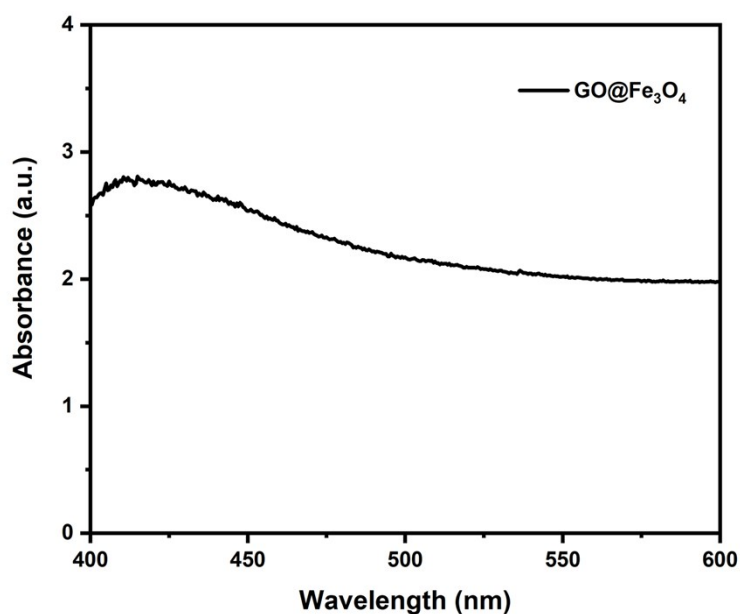

Fig. S1. Ultraviolet spectrum of GO@Fe<sub>3</sub>O<sub>4</sub> (0.6 mg/mL)

#### 3. The binding ability of GO@Fe<sub>3</sub>O<sub>4</sub> for ssDNA

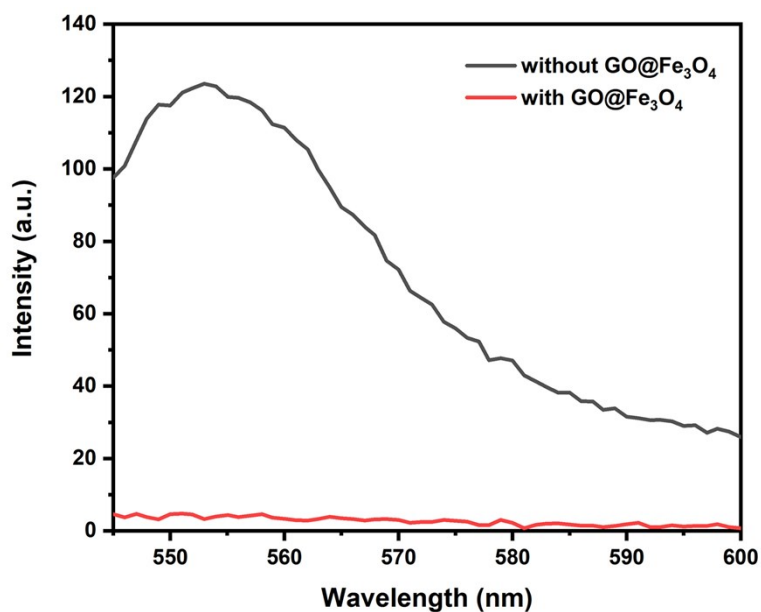

Fig. S2. Intensity of the HEX-labelled *E. coli* aptamer before and after incubation with 0.6 mg/mL GO@Fe<sub>3</sub>O<sub>4</sub>.

#### 4. Performance comparison for *E. coli* detection

Table S1. Performance comparison for *E. coli* detection.

| Detection method | Linear range (CFU/mL)                | LOD (CFU/mL) | Detection time | Reference                           |
|------------------|--------------------------------------|--------------|----------------|-------------------------------------|
| Electrochemical  | 10 <sup>3</sup> --10 <sup>8</sup>    | 100          | 3 h            | (Zhang et.al 2018) <sup>1</sup>     |
| Fluorescence     | 500--10 <sup>6</sup>                 | 487          | 40 min         | (Hu et.al 2021) <sup>2</sup>        |
| Flow Cytometry   | 3×10 <sup>4</sup> —3×10 <sup>8</sup> | 100          | 1 h            | (He et.al 2020) <sup>3</sup>        |
| Impedance        | 10 <sup>3</sup> --10 <sup>7</sup>    | 500          | 1 h            | (Elgiddawy et.al 2020) <sup>4</sup> |
| Immunosensor     | 10 <sup>2</sup> --10 <sup>7</sup>    | 267          | 1.5 h          | (Li et.al 2020) <sup>5</sup>        |
| Fluorescence     | 10 <sup>3</sup> --10 <sup>7</sup>    | 467          | 30 min         | This work                           |

#### 5. Oligonucleotide sequences for *E. coli* recognition

Table S2. Oligonucleotide sequences used in this experiment.

| Oligonucleotide           | Sequence (5' to 3')                                                       |
|---------------------------|---------------------------------------------------------------------------|
| Aptamer( <i>E. coli</i> ) | NH <sub>2</sub> - CCGGACGCTTATGCCTTGCCATCTACAGAGCAGGTGTGACGG <sup>6</sup> |
| Aptamer(HEX)              | HEX- CCGGACGCTTATGCCTTGCCATCTACAGAGCAGGTGTGACGG                           |

#### References

1. J. Zhang, J. Wang, X. Zhang and F. He, Biosens Bioelectron, 2018, 118, 9-15.
2. X. Hu, Y. Li, Y. Xu, Z. Gan, X. Zou, J. Shi, X. Huang, Z. Li and Y. Li, Food Chem, 2021, 339, 127775.
3. S. He, X. Hong, M. Zhang, L. Wu and X. Yan, Anal Chem, 2020, 92, 2393-2400.

- 
- 37 4. N. Elgiddawy, S. Ren, A. Yassar, A. Louis-Joseph, H. Sauriat-Dorizon, W. M. A. El Rouby, A. O. El-Gendy, A. A. Farghali and H. Korri-  
38 Yousoufi, *ACS Appl Mater Interfaces*, 2020, 12, 39979-39990.
- 39 5. X. Li, S. Dong, P. Arul, H. Liu, L. Liu, H. Wang, Q. Zhang, E. Gyimah, S. Yakubu and Z. Zhang, *Talanta*, 2020, 214, 120859.
- 40 6. W. Wu, J. Zhang, M. Zheng, Y. Zhong, J. Yang, Y. Zhao, W. Wu, W. Ye, J. Wen, Q. Wang and J. Lu, *PLoS One*, 2012, 7, e48999.
- 41
-
